# Supplementary material for: Identification of gut microbes-related molecular subtypes and their biomarkers in colorectal cancer
Source: publisher site journal article supplement (doi:10.18632/aging.205480), 2024-01-29
Supplement: Supplementary file [file aging-v16i3-205480-supplementary-material-SD2.pdf]

## SUPPLEMENTARY TABLE

Supplementary Table 1. Univariate Cox regression analysis identified 9 prognostic genes in the TCGA-COAD cohort ( $P < 0.05$ ).

| <b>GENE</b> | <b>HR</b> | <b>P</b> |
|-------------|-----------|----------|
| MTOR        | 2.256     | 0.007    |
| MMP9        | 2.012     | 0.025    |
| NPC1L1      | 0.433     | 0.007    |
| PKN2        | 1.853     | 0.038    |
| PTGS2       | 2.064     | 0.027    |
| SULT2B1     | 0.552     | 0.045    |
| BCL10       | 2.248     | 0.007    |
| STAT3       | 2.104     | 0.019    |
| IL7         | 2.090     | 0.019    |
